# Supplementary material for: A method to deliver patterned electrical impulses to Schwann cells cultured on an artificial axon
Source: PubMed Central journal article supplement — Neural Regen Res. 2019 Jun;14(6):1052–9. doi: 10.4103/1673-5374.250626 (PMC6404504; doi:10.4103/1673-5374.250626), 2019-06
Supplement: NRR-14-1052_Suppl1.pdf [file NRR-14-1052_Suppl1.pdf]

## OPEN PEER REVIEW REPORT 1

**Name of journal:** Neural Regeneration Research

**Manuscript No:** NRR-D-18-00805

**Title:** A method to deliver patterned electrical impulses to Schwann cells cultured on an artificial axon

**Reviewer's Name:** Tufan Mert

**Reviewer's country:** Turkey

**Date sent for review:** 2018-11-23

**Date reviewed:** 2018-12-03

**Review time:** 10 days

### COMMENTS TO AUTHORS

In the paper entitled "A method to deliver patterned electrical impulses to Schwann cells cultured on an artificial axon" the authors have investigated the technology to deliver patterned electrical impulses through an artificial axon (an electroconductive carbon fiber). this manuscript reports the adherence and ensheath of Schwann cells to artificial axon in the presence of patterned electrical impulses and also suggest that this make feasible to investigate the response of Schwann cells to patterned electrical impulses in vitro in the future.

An interesting paper however there are some problems that needs clarification

1. Abstract: All abbreviations used in text should be checked (e.g. SC) and abstract should be revised according to an article format.
2. Introduction: This part is very long. Discussion and/or findings should be removed and aims can be clearly stated.
3. Results: Is there a comparative or numerical data?
4. Discussion: this part can be revised. All events that happen during myelination, signaling reaction do not explain the observed effects and are more on reading books level. A clear explanation/discussion for the observed effects can be emphasized.
