# Supplementary material for: A method to deliver patterned electrical impulses to Schwann cells cultured on an artificial axon
Source: PubMed Central journal article supplement — Neural Regen Res. 2019 Jun;14(6):1052–9. doi: 10.4103/1673-5374.250626 (PMC6404504; doi:10.4103/1673-5374.250626), 2019-06
Supplement: NRR-14-1052_Suppl2.pdf [file NRR-14-1052_Suppl2.pdf]

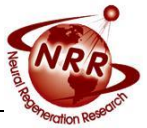

## OPEN PEER REVIEW REPORT 2

**Name of journal:** Neural Regeneration Research

**Manuscript No:** NRR-D-18-00805

**Title:** A method to deliver patterned electrical impulses to Schwann cells cultured on an artificial axon

**Reviewer's Name:** Shan Lu

**Reviewer's country:** UNITED STATES

**Date sent for review:** 2018-11-23

**Date reviewed:** 2018-12-07

**Review time:** 14 days

### COMMENTS TO AUTHORS

The authors described a method to study the patterned electrical impulses on Schwann cell myelination process. This method would be very useful if it works well. The principle of the method looks good and interesting. However, the author did not characterize the efficiency of the system extensively with only two pictures showing the surrounding Schwann cells on the carbon fibers. Another thing is that the author did not compare the myelination products in their system with the one generated before using the co-culture of Schwann cell and neurons. It will be a big improvement for this work and the system will be appreciated more. In general, the paper reads very well. However, there are too many abbreviations, like CF and PLC. It is really hard for readers to follow.

A grammar mistake found in the paper:

"Howe, in 2006, cultured OLG on artificial fibers and reported about the Althaus experiment in his paper and the interesting feature of CF to be electroconductive" should be "However".
